# Supplementary material for: Multiple Close-Range Geomatic Techniques for the Kinematic Study of the La Paúl Rock Glacier, Southern Pyrenees
Source: MDPI journal article supplement (doi:10.3390/rs16010134), 2023-12-28
Supplement: s1 [file s1]

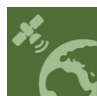

## Supplementary Material

**Table S1:** Planimetric and altimetric displacements (cm/y) of the GNSS monitored points in the La Paul rock glacier. Missing data are due to measurements that were either not performed or had a significant error.

|             | 2013-2014   |            | 2014-2015   |            | 2015-2016   |            | 2016-2017   |            | 2017-2018   |            | 2018-2019   |            | 2019-2020   |            |
|-------------|-------------|------------|-------------|------------|-------------|------------|-------------|------------|-------------|------------|-------------|------------|-------------|------------|
| ID          | $\Delta XY$ | $\Delta Z$ |
| 1           | 29          | -24        | 33          | -5         | 33          | -16        | 31          | -26        | 33          | -10        | 28          | -1         | 35          | -21        |
| 2           | 28          | -26        | 39          | -14        | 45          | -15        | 44          | -27        | 40          | -15        | 34          | -6         | 50          | -23        |
| 3           | 94          | -13        | 46          | -14        | 160         | -39        | 42          | -31        | 41          | -12        | 35          | -11        | 40          | -24        |
| 4           | 24          | -24        | 33          | -7         | 27          | -19        | 29          | -24        | 28          | -11        | 24          | -3         | 29          | -23        |
| 5           | 38          | -31        | 54          | -27        | 44          | -25        | 47          | -43        | 42          | -19        | 38          | -18        | 49          | -34        |
| 6           | 25          | -20        | 38          | -8         | 32          | -13        | 35          | -27        | 30          | -5         | 30          | -2         | 33          | -21        |
| 7           | 14          | -16        | 16          | -3         | 16          | -9         | 19          | -22        | 17          | -3         | 12          | 2          | 18          | -17        |
| 8           | 29          | -25        | 36          | -8         | 37          | -19        | 34          | -24        |             |            |             |            | 37          | -21        |
| 9           |             |            |             |            | 35          | -15        | 40          | -27        | 32          | -10        | 26          | -6         | 40          | -26        |
| 10          |             |            |             |            | 39          | -22        | 42          | -32        | 36          | -12        | 31          | -11        | 39          | -29        |
| 11          | 33          | -22        | 40          | -13        | 41          | -17        | 36          | -30        | 37          | -13        | 32          | -5         | 36          | -25        |
| 12          | 42          | 19         | 16          | -9         | 15          | -11        | 13          | -21        | 13          | -4         | 11          | -1         | 13          | -15        |
| 13          | 8           | -21        | 15          | -7         | 16          | -10        | 11          | -22        | 15          | -3         | 9           | 0          | 15          | -12        |
| 14          | 28          | -24        | 31          | -9         | 33          | -20        | 33          | -27        | 31          | -17        | 26          | -5         | 26          | -23        |
| 15          | 29          | -30        | 39          | -22        | 41          | -30        | 41          | -41        | 39          | -21        | 30          | -13        | 40          | -32        |
| 16          | 29          | -34        | 42          | -24        | 41          | -29        | 43          | -35        | 36          | -20        | 35          | -11        | 39          | -33        |
| 17          | 24          | -32        | 38          | -20        | 43          | -27        | 36          | -35        | 35          | -21        | 29          | -11        | 29          | -56        |
| 18          | 34          | -35        | 43          | -17        | 44          | -36        | 39          | -38        | 38          | -24        | 31          | -14        | 35          | -56        |
| 19          | 16          | -25        | 30          | -15        | 31          | -25        | 16          | -33        | 22          | -13        | 18          | -6         | 25          | -44        |
| 20          | 28          | -33        | 36          | -23        | 32          | -31        | 35          | -37        | 26          | -17        | 24          | -12        | 34          | -54        |
| <b>Mean</b> | <b>31</b>   | <b>-21</b> | <b>35</b>   | <b>-14</b> | <b>40</b>   | <b>-21</b> | <b>33</b>   | <b>-30</b> | <b>31</b>   | <b>-13</b> | <b>27</b>   | <b>-7</b>  | <b>33</b>   | <b>-29</b> |
